# Supplementary material for: Brief communication: Rapid acceleration of the Brunt Ice Shelf after calving of iceberg A-81
Source: Copernicus journal article supplement (doi:10.5194/tc-18-705-2024), 2024-02-13
Supplement: Supplementary file [file tc-18-705-2024-supplement-title-page.pdf › tc-18-705-2024-supplement-title-page.pdf]

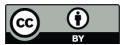

*Supplement of*

## **Brief communication: Rapid acceleration of the Brunt Ice Shelf after calving of iceberg A-81**

**Oliver J. Marsh et al.**

*Correspondence to:* Oliver J. Marsh ([olrs@bas.ac.uk](mailto:olrs@bas.ac.uk))

- [tc-18-705-2024-supplement-title-page.pdf](#)
- [MIR\\_Animation.gif](#)

The copyright of individual parts of the supplement might differ from the article licence.
